# Supplementary material for: Adding UVA and Far-Red Light to White LED Affects Growth, Morphology, and Phytochemicals of Indoor-Grown Microgreens
Source: MDPI journal article supplement (doi:10.3390/su14148552), 2022-07-13
Supplement: s1 [file s1]

Archive with 1 entries (1 files):
- sustainability-1791500-supplementary.pdf
